# Supplementary material for: Genome-Wide Identification and Salt Stress Response Analysis of the bZIP Transcription Factor Family in Sugar Beet
Source: MDPI journal article supplement (doi:10.3390/ijms231911573), 2022-09-30
Supplement: s1 [file s1]

**Supplement Table S1.** Basic information of the *BvbZIP* genes family.

| Gene name       | Gene ID      | Chromosome | Genomic location  | Protein ID | Length(aa) | pI   | MW(kDa) |
|-----------------|--------------|------------|-------------------|------------|------------|------|---------|
| <i>BvbZIP1</i>  | LOC104905689 | Chr1       | 501404-512443     | BvbZIP1a   | 360        | 6.78 | 40.87   |
|                 |              |            |                   | BvbZIP1b   | 360        | 6.78 | 40.87   |
| <i>BvbZIP2</i>  | LOC104886686 | Chr1       | 3977916-3982942   | BvbZIP2a   | 420        | 6.16 | 44.61   |
|                 |              |            |                   | BvbZIP2b   | 420        | 6.16 | 44.61   |
|                 |              |            |                   | BvbZIP2c   | 418        | 6.16 | 44.38   |
| <i>BvbZIP3</i>  | LOC104887833 | Chr1       | 5540972-5546329   | BvbZIP3    | 532        | 6.27 | 58.42   |
| <i>BvbZIP4</i>  | LOC104889396 | Chr1       | 7653114-7654814   | BvbZIP4    | 171        | 5.2  | 19.58   |
| <i>BvbZIP5</i>  | LOC104895660 | Chr1       | 18474752-18486050 | BvbZIP5    | 361        | 8.03 | 39.30   |
| <i>BvbZIP6</i>  | LOC104895875 | Chr1       | 19888225-19896453 | BvbZIP6    | 332        | 6.64 | 36.63   |
| <i>BvbZIP7</i>  | LOC104899269 | Chr1       | 29718507-29722385 | BvbZIP7    | 305        | 4.78 | 34.71   |
| <i>BvbZIP8</i>  | LOC104905249 | Chr2       | 2777401-2779008   | BvbZIP8    | 269        | 6.06 | 29.66   |
| <i>BvbZIP9</i>  | LOC104907325 | Chr2       | 5556010-5557185   | BvbZIP9    | 184        | 5.25 | 21.45   |
| <i>BvbZIP10</i> | LOC104885558 | Chr2       | 10954314-10961255 | BvbZIP10   | 841        | 5.73 | 92.44   |
| <i>BvbZIP11</i> | LOC104886702 | Chr2       | 15713633-15722655 | BvbZIP11a  | 351        | 5.99 | 38.47   |
|                 |              |            |                   | BvbZIP11b  | 350        | 5.99 | 38.34   |
| <i>BvbZIP12</i> | LOC104887563 | Chr2       | 36849298-36858494 | BvbZIP12a  | 455        | 6.16 | 50.10   |
|                 |              |            |                   | BvbZIP12b  | 397        | 7.08 | 44.18   |
| <i>BvbZIP13</i> | LOC104887633 | Chr2       | 37909453-37913193 | BvbZIP13   | 406        | 5.36 | 45.71   |
| <i>BvbZIP14</i> | LOC104887661 | Chr2       | 38413121-38417226 | BvbZIP14   | 168        | 9.9  | 18.15   |
| <i>BvbZIP15</i> | LOC104888155 | Chr3       | 3093992-3095517   | BvbZIP15   | 173        | 6.13 | 19.53   |
| <i>BvbZIP16</i> | LOC104888309 | Chr3       | 4903671-4911186   | BvbZIP16a  | 348        | 6.72 | 37.28   |
|                 |              |            |                   | BvbZIP16b  | 348        | 6.72 | 37.28   |
|                 |              |            |                   | BvbZIP16c  | 348        | 6.72 | 37.28   |
|                 |              |            |                   | BvbZIP16d  | 345        | 6.72 | 36.92   |
|                 |              |            |                   | BvbZIP16e  | 348        | 6.72 | 37.28   |
| <i>BvbZIP17</i> | LOC104888416 | Chr3       | 6266841-6267350   | BvbZIP17   | 169        | 8.81 | 18.89   |
| <i>BvbZIP18</i> | LOC104888846 | Chr3       | 12517919-12529117 | BvbZIP18   | 388        | 6.02 | 42.86   |
| <i>BvbZIP19</i> | LOC104889231 | Chr3       | 19135726-19150319 | BvbZIP19   | 577        | 7.17 | 63.77   |
| <i>BvbZIP20</i> | LOC104889491 | Chr3       | 23089301-23097287 | BvbZIP20a  | 449        | 7.12 | 49.51   |
|                 |              |            |                   | BvbZIP20b  | 426        | 6.05 | 47.46   |
| <i>BvbZIP21</i> | LOC104889531 | Chr3       | 23723459-23726886 | BvbZIP21   | 690        | 5.66 | 75.24   |
| <i>BvbZIP22</i> | LOC104889671 | Chr3       | 25013663-25018273 | BvbZIP22a  | 333        | 9.27 | 36.54   |
|                 |              |            |                   | BvbZIP22b  | 333        | 9.27 | 36.54   |
| <i>BvbZIP23</i> | LOC104906977 | Chr4       | 459791-463907     | BvbZIP23   | 164        | 5.47 | 19.01   |
| <i>BvbZIP24</i> | LOC104907452 | Chr4       | 1102915-1103742   | BvbZIP24   | 275        | 5.03 | 30.80   |
| <i>BvbZIP25</i> | LOC104890911 | Chr4       | 12442060-12447944 | BvbZIP25   | 435        | 6.47 | 47.16   |
| <i>BvbZIP26</i> | LOC104891424 | Chr4       | 24868943-24873916 | BvbZIP26a  | 353        | 5.73 | 38.59   |
|                 |              |            |                   | BvbZIP26b  | 352        | 5.73 | 38.51   |
| <i>BvbZIP27</i> | LOC104893043 | Chr5       | 16232097-16244958 | BvbZIP27a  | 397        | 5.85 | 42.14   |
|                 |              |            |                   | BvbZIP27b  | 395        | 5.97 | 41.89   |
|                 |              |            |                   | BvbZIP27c  | 371        | 5.85 | 39.44   |
| <i>BvbZIP28</i> | LOC104894764 | Chr5       | 51617619-51618983 | BvbZIP28   | 141        | 5.87 | 16.21   |
| <i>BvbZIP29</i> | LOC104894976 | Chr6       | 1714961-1716254   | BvbZIP29   | 289        | 8.49 | 32.88   |
| <i>BvbZIP30</i> | LOC104895073 | Chr6       | 2809761-2811097   | BvbZIP30   | 180        | 5.36 | 20.24   |
| <i>BvbZIP31</i> | LOC104895559 | Chr6       | 8140566-8161505   | BvbZIP31a  | 240        | 9.35 | 26.69   |
|                 |              |            |                   | BvbZIP31b  | 239        | 8.36 | 26.66   |
| <i>BvbZIP32</i> | LOC104895725 | Chr6       | 10485448-10490260 | BvbZIP32a  | 363        | 6.12 | 41.23   |
|                 |              |            |                   | BvbZIP32b  | 327        | 5.3  | 36.85   |
| <i>BvbZIP33</i> | LOC104896277 | Chr6       | 20681507-20682236 | BvbZIP33   | 204        | 6.17 | 23.95   |

|                 |              |         |                   |                  |     |      |       |
|-----------------|--------------|---------|-------------------|------------------|-----|------|-------|
| <i>BvbZIP34</i> | LOC104896274 | Chr6    | 20809273-20810261 | <i>BvbZIP34</i>  | 200 | 5.56 | 23.18 |
| <i>BvbZIP35</i> | LOC104898371 | Chr7    | 3838768-3848663   | <i>BvbZIP35</i>  | 451 | 8.3  | 49.19 |
| <i>BvbZIP36</i> | LOC104898393 | Chr7    | 4346206-4351489   | <i>BvbZIP36</i>  | 465 | 6.87 | 51.64 |
| <i>BvbZIP37</i> | LOC104899695 | Chr7    | 35447527-35451803 | <i>BvbZIP37</i>  | 489 | 9.49 | 51.59 |
| <i>BvbZIP38</i> | LOC104900287 | Chr7    | 43158294-43161957 | <i>BvbZIP38</i>  | 386 | 5.69 | 42.52 |
| <i>BvbZIP39</i> | LOC104900318 | Chr7    | 43480497-43490642 | <i>BvbZIP39a</i> | 514 | 7.84 | 57.29 |
|                 |              |         |                   | <i>BvbZIP39b</i> | 514 | 7.84 | 57.29 |
|                 |              |         |                   | <i>BvbZIP39c</i> | 510 | 8.3  | 56.97 |
|                 |              |         |                   | <i>BvbZIP39d</i> | 500 | 7.1  | 55.79 |
|                 |              |         |                   | <i>BvbZIP39e</i> | 485 | 8.66 | 53.93 |
| <i>BvbZIP40</i> | LOC104900999 | Chr8    | 8997688-8998614   | <i>BvbZIP40</i>  | 208 | 5.76 | 23.84 |
| <i>BvbZIP41</i> | LOC104883107 | Chr9    | 13148-16084       | <i>BvbZIP41</i>  | 572 | 6.94 | 62.25 |
| <i>BvbZIP42</i> | LOC104903082 | Chr9    | 11871350-11881962 | <i>BvbZIP42a</i> | 281 | 8.42 | 31.34 |
|                 |              |         |                   | <i>BvbZIP42b</i> | 276 | 8.23 | 30.70 |
|                 |              |         |                   | <i>BvbZIP42c</i> | 270 | 6.48 | 30.11 |
|                 |              |         |                   | <i>BvbZIP42d</i> | 264 | 6.92 | 29.46 |
|                 |              |         |                   | <i>BvbZIP42e</i> | 248 | 7.63 | 27.45 |
|                 |              |         |                   | <i>BvbZIP42f</i> | 245 | 8.55 | 27.17 |
|                 |              |         |                   | <i>BvbZIP42g</i> | 281 | 8.42 | 31.34 |
|                 |              |         |                   | <i>BvbZIP42h</i> | 257 | 8.24 | 28.66 |
| <i>BvbZIP43</i> | LOC104903424 | Chr9    | 21452927-21456740 | <i>BvbZIP43</i>  | 349 | 5.67 | 39.18 |
| <i>BvbZIP44</i> | LOC104903923 | Chr9    | 33644446-33649387 | <i>BvbZIP44</i>  | 290 | 5.89 | 31.71 |
| <i>BvbZIP45</i> | LOC104904696 | Chr9    | 41736456-41743229 | <i>BvbZIP45</i>  | 380 | 8.65 | 42.46 |
| <i>BvbZIP46</i> | LOC104884020 | Unknown | 5540-16672        | <i>BvbZIP46a</i> | 205 | 5.71 | 23.55 |
|                 |              |         |                   | <i>BvbZIP46b</i> | 194 | 6.6  | 21.85 |
| <i>BvbZIP47</i> | LOC104884708 | Unknown | 83055-94429       | <i>BvbZIP47</i>  | 353 | 5.23 | 37.06 |
| <i>BvbZIP48</i> | LOC104884843 | Unknown | 52251-61547       | <i>BvbZIP48a</i> | 434 | 6.06 | 48.48 |
|                 |              |         |                   | <i>BvbZIP48b</i> | 429 | 6.02 | 47.83 |

**Supplement Table S2.** SRA transcriptome data item information.

| Sample ID   | Accession   | Treatment                 | Time          | Tissue |
|-------------|-------------|---------------------------|---------------|--------|
| SRR12730708 | PRJNA666117 | Salt stress (300 mM NaCl) | control (0 h) | Leaf   |
| SRR12730707 | PRJNA666117 | Salt stress (300 mM NaCl) | control (0 h) | Leaf   |
| SRR12730696 | PRJNA666117 | Salt stress (300 mM NaCl) | control (0 h) | Leaf   |
| SRR12730685 | PRJNA666117 | Salt stress (300 mM NaCl) | 12 h          | Leaf   |
| SRR12730684 | PRJNA666117 | Salt stress (300 mM NaCl) | 12 h          | Leaf   |
| SRR12730683 | PRJNA666117 | Salt stress (300 mM NaCl) | 12 h          | Leaf   |
| SRR12730682 | PRJNA666117 | Salt stress (300 mM NaCl) | 24 h          | Leaf   |
| SRR12730681 | PRJNA666117 | Salt stress (300 mM NaCl) | 24 h          | Leaf   |
| SRR12730680 | PRJNA666117 | Salt stress (300 mM NaCl) | 24 h          | Leaf   |
| SRR12730679 | PRJNA666117 | Salt stress (300 mM NaCl) | 48 h          | Leaf   |
| SRR12730706 | PRJNA666117 | Salt stress (300 mM NaCl) | 48 h          | Leaf   |
| SRR12730705 | PRJNA666117 | Salt stress (300 mM NaCl) | 48 h          | Leaf   |
| SRR12730704 | PRJNA666117 | Salt stress (300 mM NaCl) | 72 h          | Leaf   |
| SRR12730703 | PRJNA666117 | Salt stress (300 mM NaCl) | 72 h          | Leaf   |
| SRR12730702 | PRJNA666117 | Salt stress (300 mM NaCl) | 72 h          | Leaf   |
| SRR12730701 | PRJNA666117 | Salt stress (300 mM NaCl) | control (0 h) | Root   |
| SRR12730700 | PRJNA666117 | Salt stress (300 mM NaCl) | control (0 h) | Root   |
| SRR12730699 | PRJNA666117 | Salt stress (300 mM NaCl) | control (0 h) | Root   |
| SRR12730698 | PRJNA666117 | Salt stress (300 mM NaCl) | 12 h          | Root   |
| SRR12730697 | PRJNA666117 | Salt stress (300 mM NaCl) | 12 h          | Root   |

|             |             |                           |      |      |
|-------------|-------------|---------------------------|------|------|
| SRR12730695 | PRJNA666117 | Salt stress (300 mM NaCl) | 12 h | Root |
| SRR12730694 | PRJNA666117 | Salt stress (300 mM NaCl) | 24 h | Root |
| SRR12730693 | PRJNA666117 | Salt stress (300 mM NaCl) | 24 h | Root |
| SRR12730692 | PRJNA666117 | Salt stress (300 mM NaCl) | 24 h | Root |
| SRR12730691 | PRJNA666117 | Salt stress (300 mM NaCl) | 48 h | Root |
| SRR12730690 | PRJNA666117 | Salt stress (300 mM NaCl) | 48 h | Root |
| SRR12730689 | PRJNA666117 | Salt stress (300 mM NaCl) | 48 h | Root |
| SRR12730688 | PRJNA666117 | Salt stress (300 mM NaCl) | 72 h | Root |
| SRR12730687 | PRJNA666117 | Salt stress (300 mM NaCl) | 72 h | Root |
| SRR12730686 | PRJNA666117 | Salt stress (300 mM NaCl) | 72 h | Root |

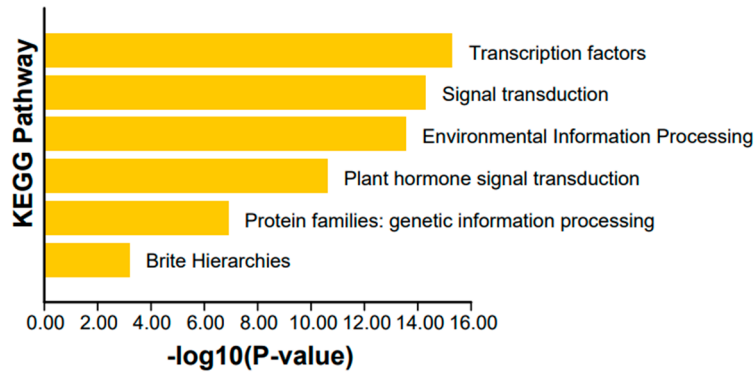

**Supplement Figure S1.** KEGG enrichment analysis of *BvbZIP* genes. The *BvbZIP* genes was enriched into six KEGG pathways, including environmental information processing and plant hormone signal transduction processes.

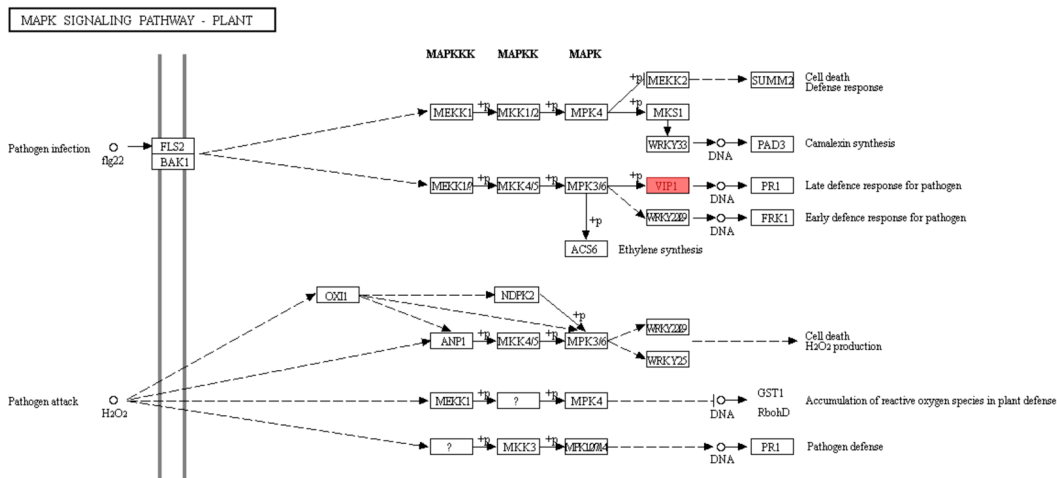

**Supplement Figure S2.** KEGG pathway of *BvbZIP3*(VIP1) gene. *BvbZIP3*(VIP1) is involved in the cascade reaction pathway of pathogen infection and plays a regulatory role in late infection defense.

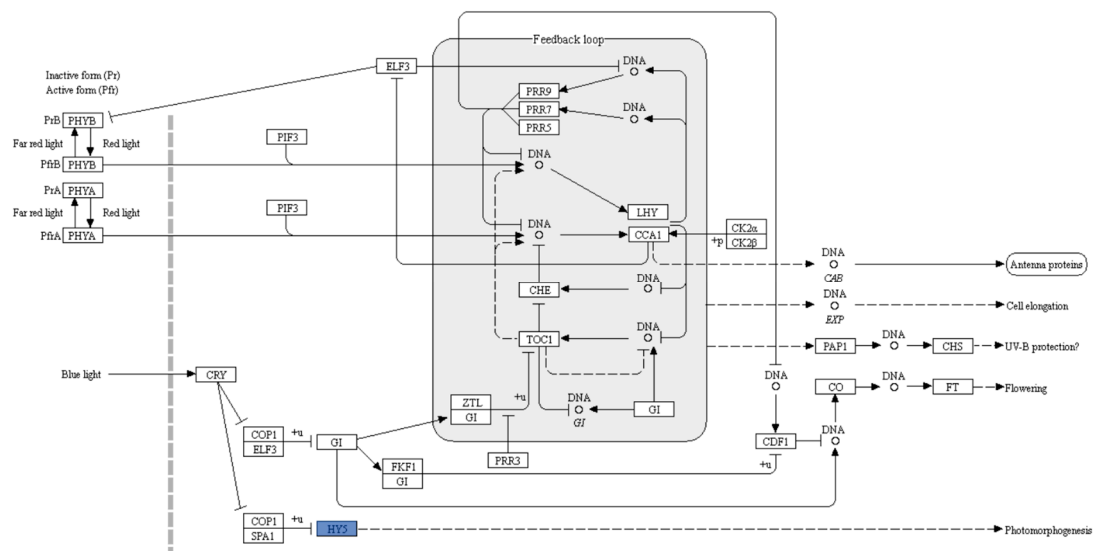

**Supplement Figure S3.** KEGG pathway of *BvbZIP14*(HY5) gene. *BvbZIP14*(HY5) is a downstream gene of COP1 and SPA1, which is involved in the blue light response pathway.

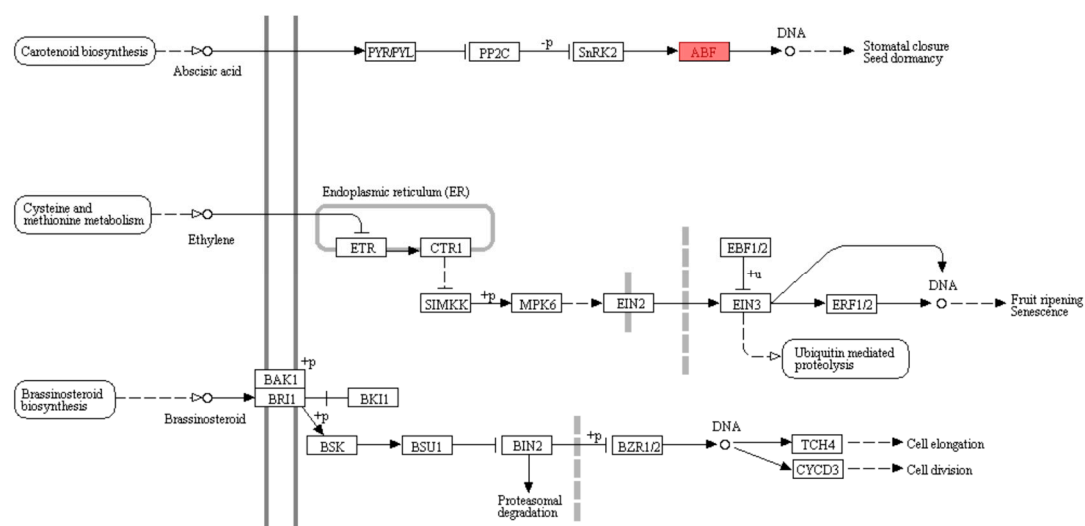

**Supplement Figure S4.** KEGG pathway diagram of *BvbZIP37*(ABF) gene. *BvbZIP37*(ABF) regulates stomatal closure and seed dormancy in response to ABA signals.
